# Supplementary material
Source: MDPI journal article supplement (https://www.mdpi.com/2071-1050/13/15/8648)
Supplement: s1 [file s1]

## Supplementary material

Table S1. Questionnaire items used in the cluster analysis for phytotherapeutic purposes

|                                                                                                                                                                                                                                                                                                                                                                                                                                                                                                                                                                                              |
|----------------------------------------------------------------------------------------------------------------------------------------------------------------------------------------------------------------------------------------------------------------------------------------------------------------------------------------------------------------------------------------------------------------------------------------------------------------------------------------------------------------------------------------------------------------------------------------------|
| Q14. Choose the health issues you have used products obtained from medicinal and aromatic plants for and evaluate the effectiveness of the products used (note 1-5, where 1 means not at all effective, and 5 means very effective). 1. Digestive problems; 2. ENT problems; 4. Dermatological problems; 5. Gynaecological problems; 7. Circulatory problems; 8. Cardiac problems; 9. Joint problems; 12. Stress, anxiety, sleep disorders; 13. Depression; 14. Immunity problems; 15. Body detox; 16. Infections.                                                                           |
| Q22. What made you resort to medicinal and aromatic plant products for your health (multiple choice)? 3. Preference for natural therapies, traditional and complementary medicine                                                                                                                                                                                                                                                                                                                                                                                                            |
| Q23. When purchasing medicinal and aromatic plant products for therapeutic purposes, how important are the following aspects (note 1 to 5, where 1 means not at all important and 5 means very important)? 1. Product quality; 2. Product composition; 4. Product eco-certification; 5. Romanian product; 6. Brand; 7. Origin of raw materials (spontaneous flora or crop); 8. Label information; 9. Product traceability information; 10. Use of ecological raw materials; 11. Use of recyclable packaging; 12. Advantageous product price; 13. Advantages offered (promotions, discounts). |
| Q25. How much confidence do you place in the following sources when choosing or deciding to use medicinal and aromatic remedies (note 1 to 5, where 1 means total distrust and 5 means total trust). 1. Specialist doctor (including competence in ayurveda, apitherapy, phytotherapy, aromatherapy, gemotherapy); 2. Pharmacist/pharmacy assistant; 3. Nature shop assistant; 4. Producer                                                                                                                                                                                                   |

Table S2. Questionnaire items used in the cluster analysis for cosmetic and personal care purposes

|                                                                                                                                                                                                                                                                                                                                                                                                                                                                                                                                                                                                                                                  |
|--------------------------------------------------------------------------------------------------------------------------------------------------------------------------------------------------------------------------------------------------------------------------------------------------------------------------------------------------------------------------------------------------------------------------------------------------------------------------------------------------------------------------------------------------------------------------------------------------------------------------------------------------|
| Q30. Do you consider that cosmetic and personal care products with medicinal and aromatic plant ingredients are safer and more effective than synthetic ones?                                                                                                                                                                                                                                                                                                                                                                                                                                                                                    |
| Q34. What made you resort to cosmetic and personal care products with medicinal and aromatic plant ingredients (multiple answer)? 2. Preference for natural products                                                                                                                                                                                                                                                                                                                                                                                                                                                                             |
| Q36. Are you willing to pay more for cosmetic and personal care products with ingredients from medicinal and aromatic plants, from 100% natural ingredients?                                                                                                                                                                                                                                                                                                                                                                                                                                                                                     |
| Q37. When you buy cosmetic and personal care products with ingredients from medicinal and aromatic plants, how important are the following aspects (note 1-5, where 1 means not at all important and 5 means very important)? 1. Product quality; 2. Ingredients used; 3. Scientifically proven benefits; 4. Absence of synthetic ingredients; 5. Product appearance; 6. Product smell; 7. Ecologically certified product; 8. Romanian product; 10. Origin of the raw materials (spontaneous flora or crops); 11. Label information; 12. Product traceability information; 13. Use of ecological raw materials; 14. Use of recyclable packaging. |
| Q38. What / who do you turn to when you want to find out about choosing or using cosmetic and personal care products with herbal and aromatic ingredients (multiple choice)? 6. Specialized books                                                                                                                                                                                                                                                                                                                                                                                                                                                |
| Q39. How much confidence do you place in the following sources when choosing or deciding to use cosmetics and personal care products with medicinal and aromatic herbal ingredients (note 1 to 5, where 1 means total distrust and 5 means total confidence). 1. Specialist doctor; 2. Pharmacist/pharmacy assistant; 3. Beautician; 4. Specialized store assistant; 5. Producer; 6. Specialized books.                                                                                                                                                                                                                                          |
| Q46. How do you assess your preoccupation with environmental protection?                                                                                                                                                                                                                                                                                                                                                                                                                                                                                                                                                                         |
| Q47. How do you assess your preoccupation for the protection of endangered medicinal and aromatic plants?                                                                                                                                                                                                                                                                                                                                                                                                                                                                                                                                        |
